# Supplementary material
Source: PubMed Central journal article supplement (PMC3454522)
Supplement: NIHMS403725-supplement-Supplemental_figure_legends.pdf [file NIHMS403725-supplement-Supplemental_figure_legends.pdf]

## SUPPLEMENTARY FIGURE LEGENDS

- Suppl. Figure 1.** Real-time PCR analysis of the changes in expression of IFN- $\gamma$  (**A**), iNOS (**B**), and endothelin 1 (**C**; ET-1) in the small intestine and colon of NHE3-deficient mice. Gene expression was normalized to TATA box-binding protein as an internal control using the  $\Delta\Delta\text{Ct}$  method, with expression values in WT mice used as a calibrator. (**D**) Analysis of NO concentration in the ileal contents of WT and NHE3<sup>-/-</sup> mice. Asterisks indicate significant differences between WT and NHE3<sup>-/-</sup> mice (T-test,  $p < 0.05$ ).
- Suppl. Figure 2.** *Expression and activation of Stat1 in the small intestinal mucosa of NHE3<sup>-/-</sup> mice.* (**A**) Representative Western blot of pY701-Stat1, total Stat1, and GAPDH. (**B**) Summary of results of total Stat1 expression (Stat1:GAPDH ratio) and (**C**) Stat1 activation (pY701-Stat1:total Stat1 ratio). Asterisks indicate significant differences between WT and NHE3<sup>-/-</sup> mice (T-test,  $p < 0.05$ ;  $n = 4$ ).
- Suppl. Figure 3.** (**A**) Cleaved caspase-3 immunostaining in the small intestinal mucosa of WT and NHE3<sup>-/-</sup> mice. Arrows point to typical apoptotic cells stained with the red chromogen (3-amino-9-ethylcarbazole). (**B**) Graph summary of caspase-3 positive cell count per field of vision calculated in a blinded fashion. No statistically significant differences were observed.

**Suppl. Figure 4.** *Ki67 staining of proliferating cells in the the small intestinal mucosa of WT and NHE3<sup>-/-</sup> mice.* With the exception of increased number of Ki67-positive mononuclear cells infiltrating the lamina propria, no significant differences were observed for the epithelial cells.

**Suppl. Figure 5.** (A) Histogram depicting the number of genes/probe sets which expression was increased or reduced at  $P < 0.05$  in NHE3<sup>-/-</sup> mice relative to their wild-type littermates (Student t-test with Benjamini and Hochberg false discovery rate as multiple testing correction). Increasing stringency of analysis (2-10 fold change on X-axis) demonstrates the magnitude of change in small intestinal gene expression profile in NHE3<sup>-/-</sup> mice. (B) Gene ontology analysis using DAVID Functional Annotation Tool (<http://david.abcc.ncifcrf.gov/>) of the 1,256 non-duplicated and well annotated genes which indicated >2-fold change at  $p < 0.05$  (Student t-test with Benjamini and Hochberg false discovery rate as multiple testing correction). Genes categorized based on biological process were grouped and ranked (threshold of 5,  $P < 0.05$ ). Categories were sorted according to the EASE score, a modified Fisher exact P value.
